# Supplementary material for: Enhanced photoluminescence from single nitrogen-vacancy defects in nanodiamonds coated with phenol-ionic complexes
Source: Royal Society of Chemistry journal article supplement (doi:10.1039/c4nr07510b), 2015-01-01
Supplement: c4nr07510b1.pdf [file c4nr07510b1.pdf]

**Supporting information for “Enhanced photoluminescence from single nitrogen-vacancy defects in nanodiamonds coated with phenol-ionic complexes”**

Kerem Bray<sup>1</sup>, Rodolfo Previdi<sup>1</sup>, Brant C. Gibson<sup>2</sup>, Olga Shimoni<sup>1\*</sup>, and Igor Aharonovich<sup>1\*</sup>

<sup>1</sup> School of Physics and Advanced Materials, University of Technology, Sydney, P.O. Box 123, Broadway, New South Wales 2007, Australia

<sup>2</sup> ARC Centre of Excellence for Nanoscale BioPhotonics, School of Applied Sciences, RMIT University, Melbourne, VIC 3001, Australia

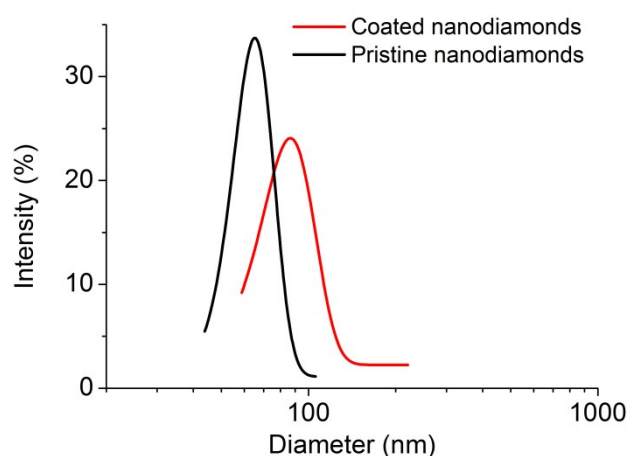

Figure S1. Dynamic light scattering of pristine (black curve) nanodiamonds and nanodiamonds coated with phenol-ionic complexes (red curve)

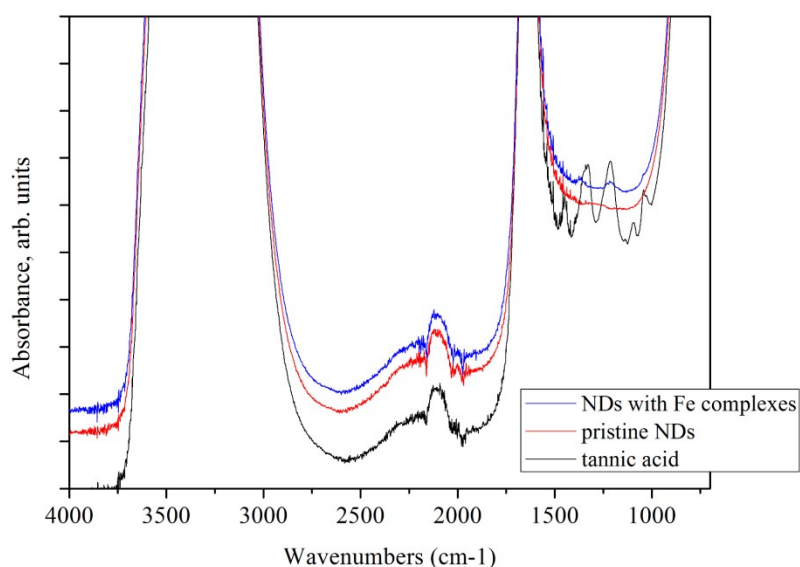

Figure S2. FTIR measurements of the pristine nanodiamonds (red curve), tannic acid (black curve) and NDs with complexes (blue curve).
